# Supplementary material for: Structure, Electrochemical, and Transport Properties of Li- and F-Modified P2-Na2/3Ni1/3Mn2/3O2 Cathode Materials for Na-Ion Batteries
Source: MDPI journal article supplement (doi:10.3390/coatings13030626), 2023-03-16
Supplement: s1 [file s1]

Archive with 1 entries (1 files):
- coatings-2263965-supplementary.pdf
