# Supplementary material for: Structure, Electrochemical, and Transport Properties of Li- and F-Modified P2-Na2/3Ni1/3Mn2/3O2 Cathode Materials for Na-Ion Batteries
Source: MDPI journal article supplement (doi:10.3390/coatings13030626), 2023-03-16
Supplement: s1 [file s1 › coatings-2263965-supplementary.pdf]

# Supporting Information

## Structure, Electrochemical, and Transport Properties of Li- and F-Modified P2- $\text{Na}_{2/3}\text{Ni}_{1/3}\text{Mn}_{2/3}\text{O}_2$ Cathode Materials for Na-Ion Batteries

Xinglong Chen, Wenyue Guo, Rui Li, Peng Du, Xiaowen Zhan\*, Shan Gao\*

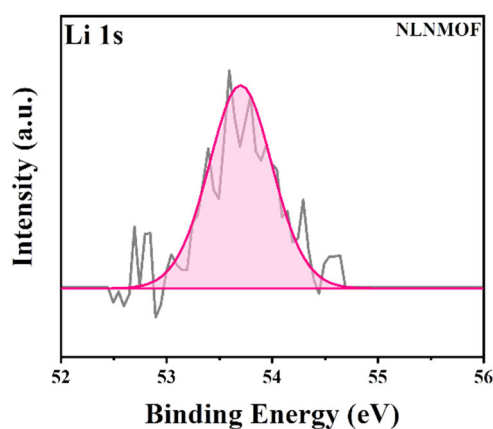

**Figure S1.** XPS spectra of (a) Li 1s and (b) F 1s of NLNMOF.

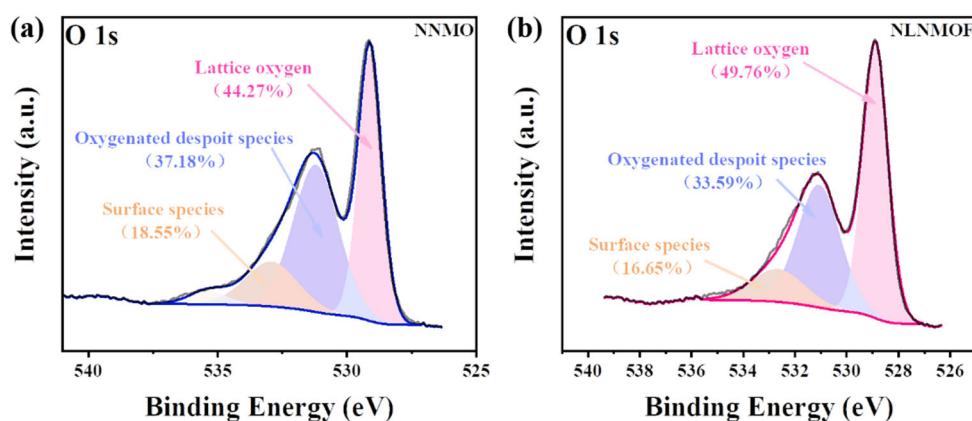

**Figure S2.** XPS O 1S spectra of (a) NNMO and (b) NLNMOF.

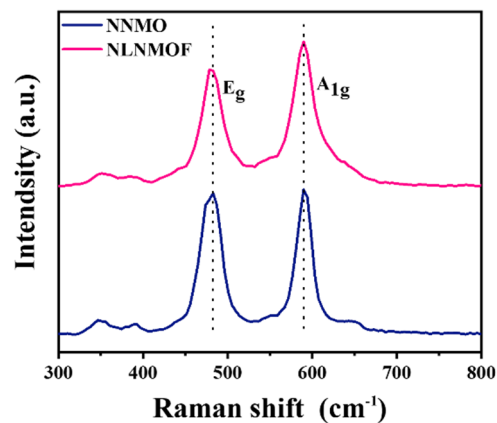

**Figure S3.** Raman spectra of NNMO and NLNMOF.

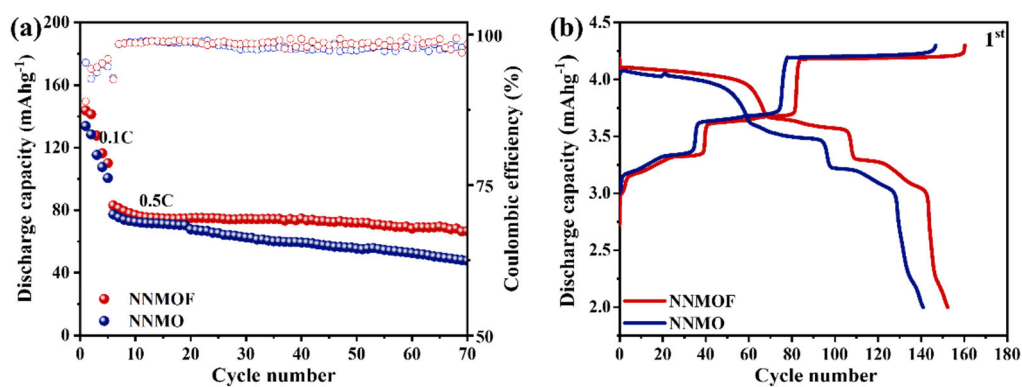

**Figure S4.** (a) The cycling performances of NNMO and NNMOF between 2.0 V and 4.3 V. (b) The initial charge-discharge curves of NNMO and NNMOF.

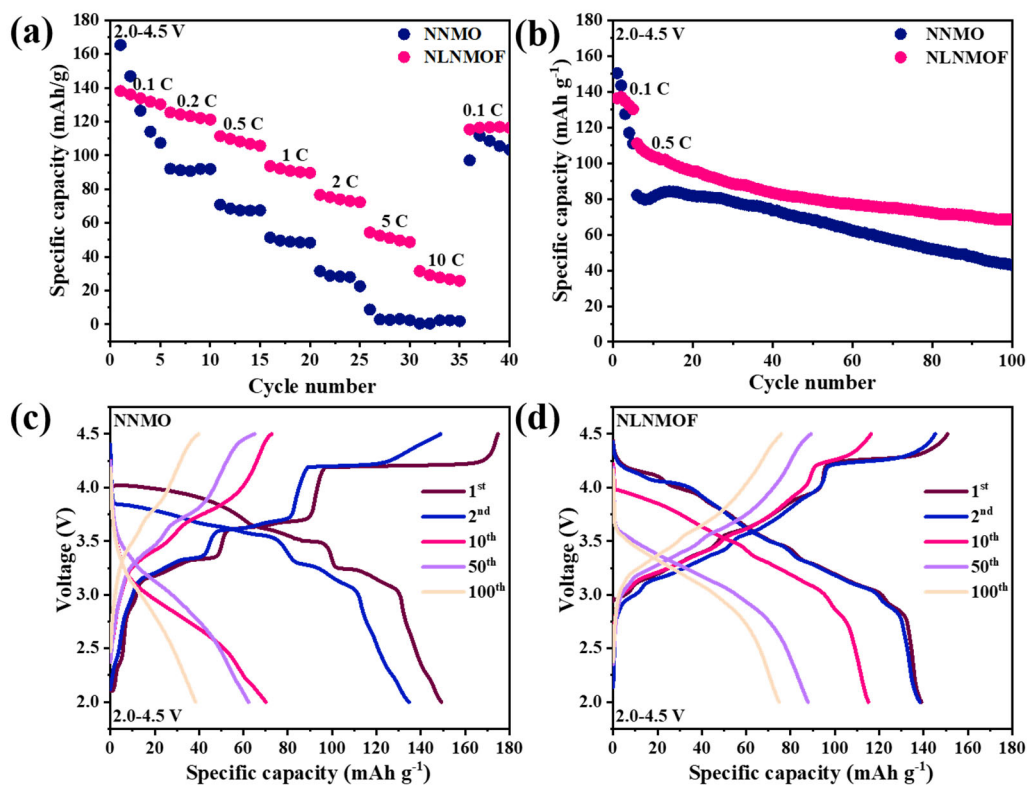

**Figure S5.** (a) Rate and (b) cycling performances of NNMO and NLNMOF electrodes between 2.0-4.5 V. The charge-discharge profiles of (c) NNMO and (d) NLNMOF for the 1<sup>st</sup>, 2<sup>nd</sup>, 10<sup>th</sup>, 50<sup>th</sup> and 100<sup>th</sup> cycle.

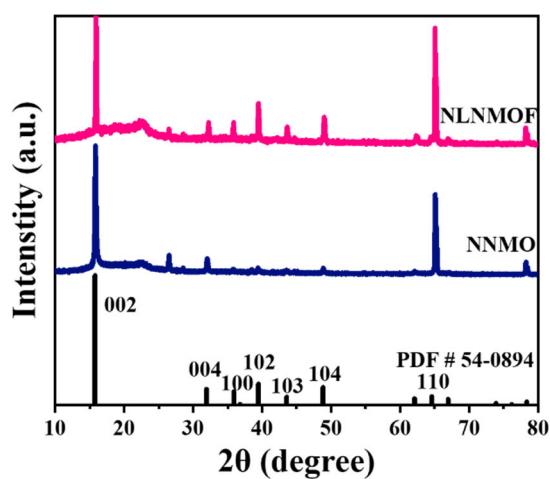

**Figure S6.** XRD patterns acquired on NNMO and NLNMOF electrodes after 100 cycles at 0.5 C.

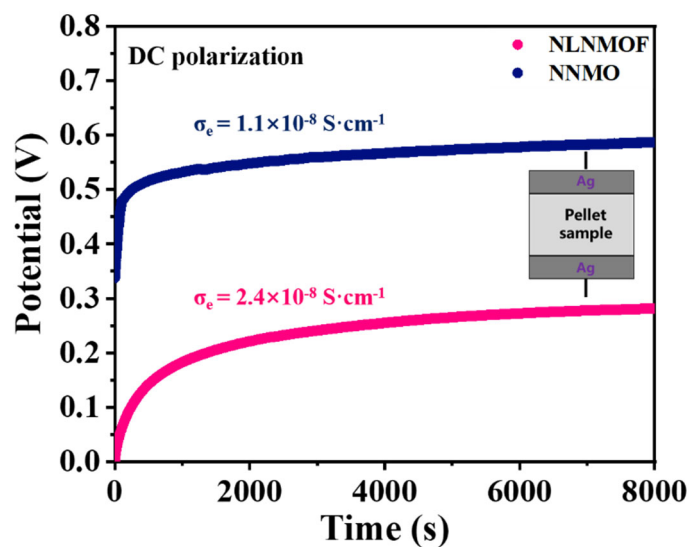

**Figure S7.** DC polarization profiles acquired on NNMO and NLNMOF pellets. The inset illustrates the measurement set-up.

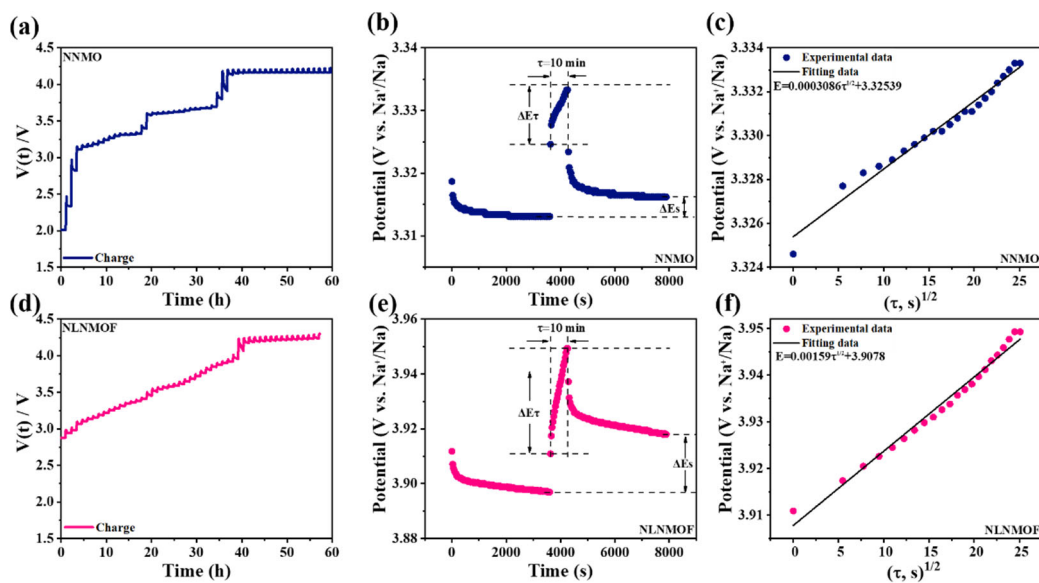

**Figure S8.** GITT curves (cell voltage vs. time) measured for (a) NNMO and (d) NLNMOF electrodes. A single titration step for (b) NNMO and (e) NLNMOF. The linear fit of the cell voltage as a function of the square root of time for (c) NNMO and (f) NLNMOF.

## Supplementary Tables [65]

**Table S1. Recipes used for the preparation of NNMO and NLNMOF samples in a 3 g batch**

| Mass (g) | NaNO <sub>3</sub> | Ni(NO <sub>3</sub> ) <sub>2</sub> ·6H <sub>2</sub> O | Mn(NO <sub>3</sub> ) <sub>2</sub> ·4H <sub>2</sub> O | C <sub>6</sub> H <sub>8</sub> O <sub>7</sub> ·H <sub>2</sub> O | LiNO <sub>3</sub> | NaF   |
|----------|-------------------|------------------------------------------------------|------------------------------------------------------|----------------------------------------------------------------|-------------------|-------|
| NLNMOF   | 1.815             | 2.622                                                | 4.596                                                | 5.742                                                          | 0.209             | 0.064 |
| NNMO     | 1.732             | 2.779                                                | 4.871                                                | 5.565                                                          | -                 | -     |

**Table S2. The proportions of Ni<sup>2+</sup> and Ni<sup>3+</sup> estimated from XPS results before and after cycling**

| Samples | Before cycling   |                  | After cycling    |                  |
|---------|------------------|------------------|------------------|------------------|
|         | Ni <sup>2+</sup> | Ni <sup>3+</sup> | Ni <sup>2+</sup> | Ni <sup>3+</sup> |
| NNMO    | 63.67%           | 36.33%           | 48.43%           | 51.57%           |
| NLNMOF  | 74.65%           | 25.35%           | 68.60%           | 31.40%           |

**Table S3. Raman peak assignments for NNMO and NLNMOF (Unit: cm<sup>-1</sup>)**

| Samples | Ni <sup>3+</sup> | E <sub>g</sub> | O–Ni–O stretching vibration | Mn <sup>4+</sup> ( $\delta$ -MnO <sub>2</sub> type) | A <sub>1g</sub> | Spinel phase <sup>1</sup> | Mn <sup>4+</sup> ( $\beta$ -MnO <sub>2</sub> or $\lambda$ -MnO <sub>2</sub> type) |
|---------|------------------|----------------|-----------------------------|-----------------------------------------------------|-----------------|---------------------------|-----------------------------------------------------------------------------------|
| NNMO    | 436; 513         | 476            | 517                         | 574                                                 | 580; 584        | 619                       | -                                                                                 |
| NLNMOF  | 446; 526         | 480            | 535                         | -                                                   | 589             | 624                       | 657                                                                               |

**Table S4. R<sub>o</sub>, R<sub>SEI</sub>, and R<sub>ct</sub> estimated for NNMO and LNNMO electrodes**

| Sample | Before cycling     |                      |                      | After 10 cycles    |                      |                     | After 100 cycles   |                      |                     |
|--------|--------------------|----------------------|----------------------|--------------------|----------------------|---------------------|--------------------|----------------------|---------------------|
|        | R <sub>o</sub> (Ω) | R <sub>SEI</sub> (Ω) | R <sub>SEI</sub> (Ω) | R <sub>o</sub> (Ω) | R <sub>SEI</sub> (Ω) | R <sub>ct</sub> (Ω) | R <sub>o</sub> (Ω) | R <sub>SEI</sub> (Ω) | R <sub>ct</sub> (Ω) |
| NNMO   | 6.6                | 26.1                 | 37.6                 | 4.3                | 35.3                 |                     | 4.7                | 45.7                 | 35.8                |
| NLNMOF | 3.9                | 57.3                 |                      | 4.2                | 41.7                 |                     | 5.8                | 41.7                 |                     |

## REFERENCE

65 Talyosef, Y.; Markovsky, B.; Salitra, G.; Aurbach, D.; Kim, H. J.; Choi, S., The study of LiNi<sub>0.5</sub>Mn<sub>1.5</sub>O<sub>4</sub> 5-V cathodes for Li-ion batteries. *Journal of Power Sources* **2005**, 146 (1-2), 664-669.
